# Supplementary material
Source: publisher site journal article supplement (https://www.oncotarget.com/article/28622)
Supplement: Supplementary file 1 [file 28622]

## Addendum: Cancer-associated fibroblasts: challenges and opportunities

**Hossein Tavana<sup>1</sup> and Gary D. Luker<sup>2</sup>**

<sup>1</sup>Department of Biomedical Engineering, The University of Akron, Akron, OH 44325, USA

<sup>2</sup>Department of Radiology, Microbiology and Immunology, Biomedical Engineering, University of Michigan, Ann Arbor, Michigan 48109, USA

**Published:**

**Copyright:** © 2024 Tavana and Luker. This is an open access article distributed under the terms of the [Creative Commons Attribution License](#) (CC BY 4.0), which permits unrestricted use, distribution, and reproduction in any medium, provided the original author and source are credited.

**This article has an addendum:** This article received a publication fee waiver.

Original article: Oncotarget. 2023; 14:211–214. <https://doi.org/10.18632/oncotarget.28385>
